# Supplementary material for: Graphene oxide membrane chemically modified by electron-transfer diazonium chemistry for efficient dye separation
Source: Royal Society of Chemistry journal article supplement (doi:10.1039/d2ra03886b), 2022-01-01
Supplement: d2ra03886b1.pdf [file d2ra03886b1.pdf]

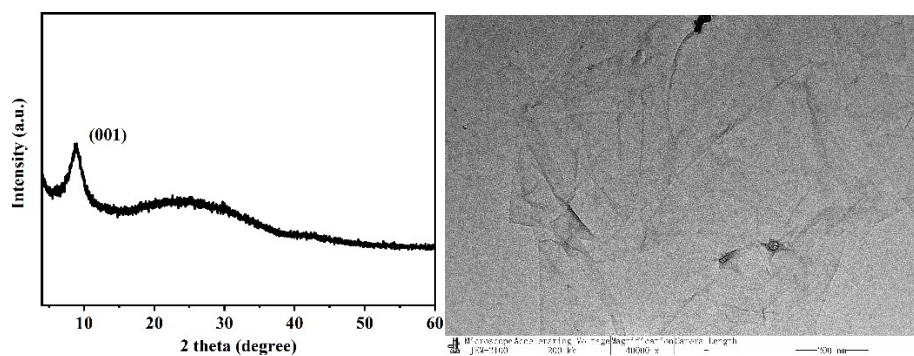

Fig. S1 XRD and TEM images of the as-prepared GO sheets

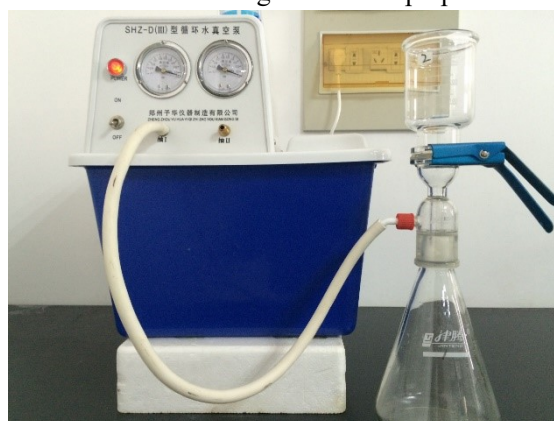

Fig. S2 Homemade separation device

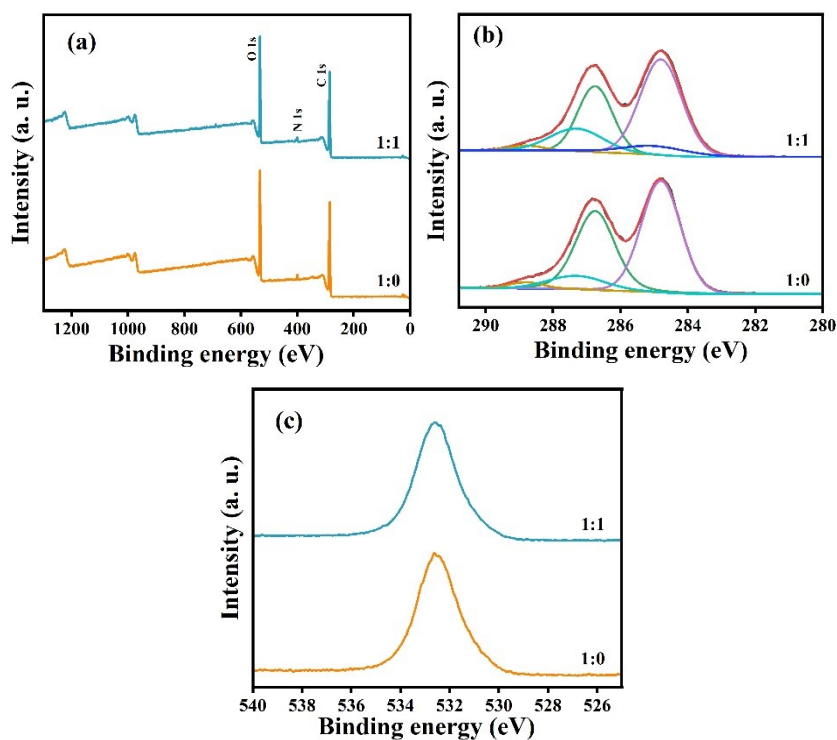

Fig.S3 XPS spectra of modified GO membranes: (a) full spectra;  
(b) C1s core level spectra; (c) O1s C1s core level spectra.

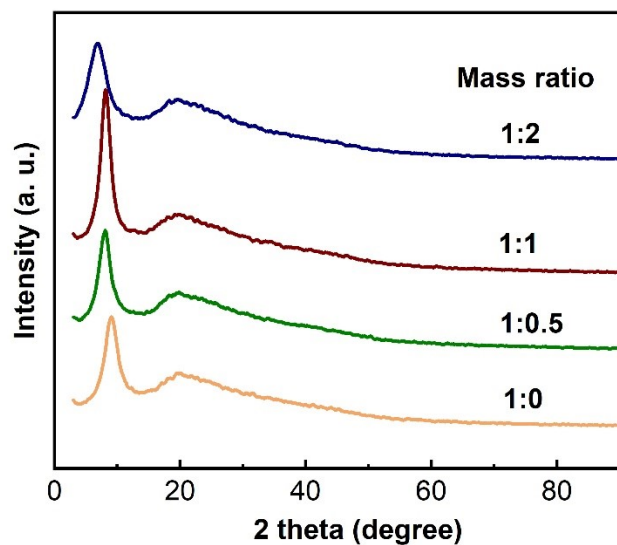

Fig.S4 XRD patterns in an intensive range of modified GO membranes with different ratios of GO to NDT.

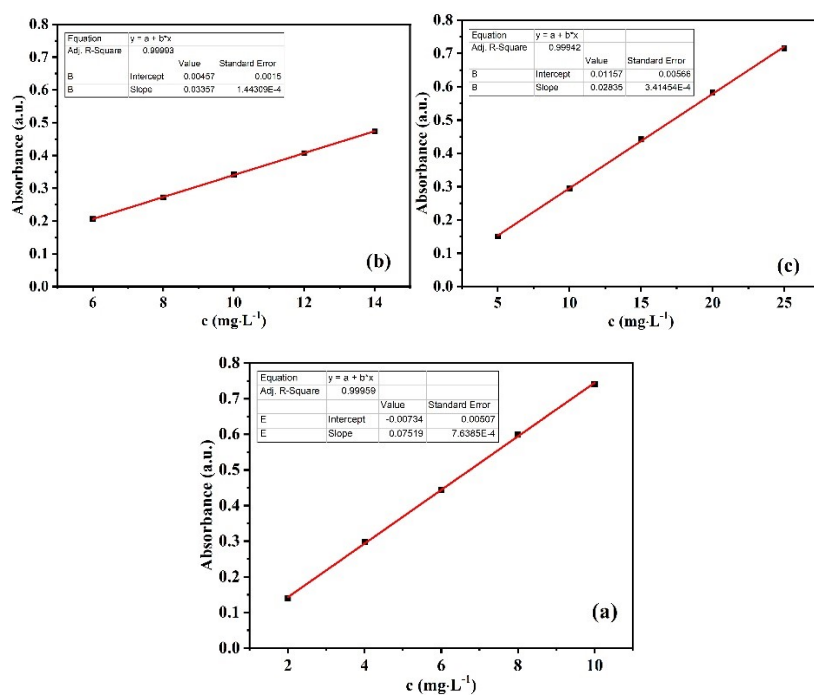

Fig.S5 A-c standard curves of EB (a), DR81(b) and MB (c).
